# Supplementary material
Source: publisher figshare collection journal article supplement (https://brill.figshare.com/ndownloader/files/35497112)
Supplement: Supplementary file 1 [file 35497112]

# **Sex, size and eco-geographic factors affect the feeding ecology of the Iberian adder, *Vipera seoanei***

Ismael Espasandín<sup>1,\*</sup>, Pedro Galán<sup>1</sup>, Fernando Martínez-Freiría<sup>2,3,\*</sup>

1 - Grupo de Investigación en Biología Evolutiva (GIBE), Departamento de Biología, Facultade de Ciencias, Universidade da Coruña, Campus da Zapateira, s/n, 15071, A Coruña, Spain

2 - CIBIO, Centro de Investigação em Biodiversidade e Recursos Genéticos, InBIO Laboratório Associado, Campus de Vairão, Universidade do Porto, 4485-661 Vairão, Portugal

3 - BIOPOLIS Program in Genomics, Biodiversity and Land Planning, CIBIO, Campus de Vairão, 4485-661 Vairão, Portugal

\*Corresponding authors; e-mails:ismaelespasandin@gmail.com; fmartinez-freiria@cibio.up.pt

ORCID iDs: Espasandín: 0000-0001-5417-8777; Martínez-Freiria: 0000-0003-2311-8960

## **Supplementary material**

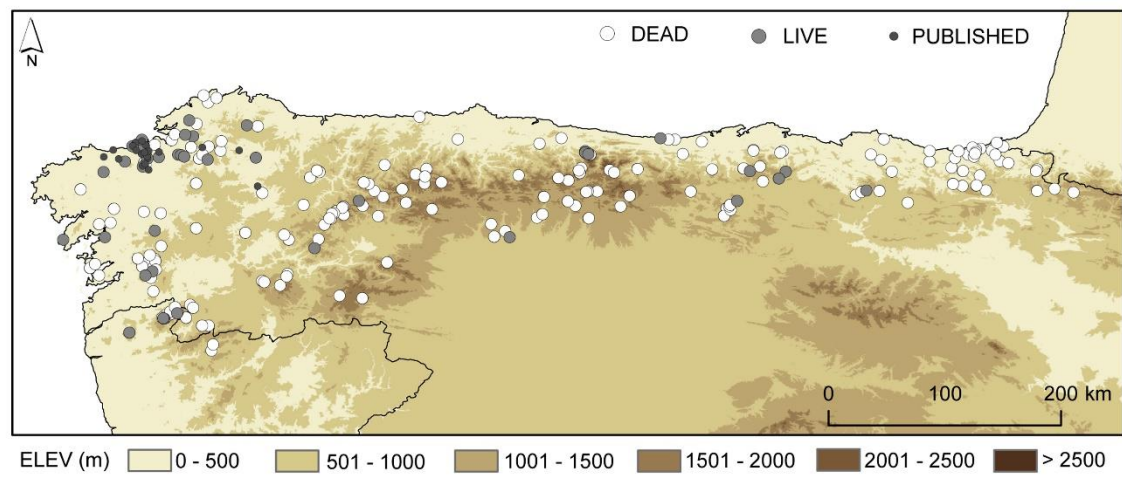

**Figure S1.** Distribution of specimens examined in this work.

**Table S1.** List of predictors including set, code, meaning type – units and % of specimens available. It is depicted the codes of Corine Land Cover categories used to construct the habitat eco-geographical predictors.

| Set            | Code | Meaning                                                     | Type - Units                                                         | Specimens<br>% |
|----------------|------|-------------------------------------------------------------|----------------------------------------------------------------------|----------------|
| biological     | SVL  | snout-vent-length                                           | continuous - mm                                                      | 88.8           |
|                | SEX  | sex                                                         | categorical - F, female; M - male                                    | 77.4           |
|                | SIZE | size                                                        | categorical - J - juvenile, SA - subadult and A - adult              | 88.8           |
|                | REPR | reproductive status of adult                                | categorical – reproductive                                           | 52.3           |
|                | O    | females                                                     | and non-reproductive                                                 |                |
|                | COL  | colouration pattern                                         | categorical - bilineata, cantabrica, classic, melanistic and uniform | 88.8           |
| temporal       | SEAS | season of the year                                          | categorical - WINTER,                                                | 85.6           |
|                | ON   |                                                             | SPRING, SUMMER and AUTUMN                                            |                |
| eco-geographic | ELEV | elevation above sea level                                   | continuous - m. Asl                                                  | 95.5           |
|                | FORE | % of forest, including broad-                               | continuous - % of pixels                                             | 95.5           |
|                | ST   | leaved, coniferous and mixed forest (CLC - 311 + 312 + 313) |                                                                      |                |
|                | PAST | % of pastures and grasslands (CLC - 231 + 321)              | continuous - % of pixels                                             | 95.5           |

|       |                                     |                          |      |
|-------|-------------------------------------|--------------------------|------|
| MOO   | % of moors and heathlands           |                          |      |
| RS    | (CLC - 322)                         | continuous - % of pixels | 95.5 |
| AGRI  | % of agriculture areas (CLC -       |                          |      |
| C     | 211 + 212)                          | continuous - % of pixels | 95.5 |
| Mean  |                                     |                          |      |
| T     | Annual Mean Temperature             | continuous - °C          | 95.5 |
| MaxT  | Max Temperature of Warmest<br>Month | continuous - °C          | 95.5 |
| APrec | Annual Precipitation                | continuous - mm          | 95.5 |
| DrPre | Precipitation of Driest Month       | continuous - mm          | 95.5 |
| c     |                                     |                          |      |

---

**Text S1.** Logistic regression analysis of the factors related to feeding frequency.

Stepwise logistic regression to analyse the influence of five predictors, including three biological traits (i.e., SEX, COL and SVL), the temporal-predictor SEASON and the eco-geographic predictor ELEV, in the probability of the binomial distribution 0 – no prey, 1 – prey. Model iteration process started with all predictors included, which were subsequently removed until reaching the most parsimonious solution (i.e. the model with the lowest value of Akaike Information Criterion; AIC).

| Model                                  | AIC    |
|----------------------------------------|--------|
| PREY ~ SEX + COL + SVL + SEASON + ELEV | 243.97 |
| PREY ~ SEX + COL + SVL + SEASON        | 242.08 |
| PREY ~ SEX + COL + SVL                 | 240.62 |
| PREY ~ SEX + SVL                       | 239.11 |

The significance of the regression coefficients of predictors is evaluated by Maximum Likelihood  $\chi^2$  tests. The effectiveness of the final model is assessed by the Hosmer-Lemeshow and McFadden's pseudo R-squared tests.

| D                         |   |                 |    | Pr(> $\chi^2$ ) |       |
|---------------------------|---|-----------------|----|-----------------|-------|
| Formula: PREY ~ SEX + SVL | F | Deviance Resid. | DF | Resid. Dev      | )     |
|                           |   |                 | 23 | 309.52          |       |
|                           |   |                 | 9  |                 |       |
|                           |   |                 | 23 |                 |       |
| SEX                       | 1 | 14.5228         | 8  | 295             | 0.000 |

|     |   |        |    |        |       |
|-----|---|--------|----|--------|-------|
|     |   |        | 23 |        |       |
|     |   | 3.9855 |    | 291.01 | 0.046 |
| SVL | 1 |        | 7  |        |       |

---

Hosmer and Lemeshow,  $P = 0.06$

McFadden's  $R^2 = 0.28$

Logistic regressions performed in R Studio version 1.1.463, using the available family of GLM stats in R.

**Text S2.** Logistic regression analysis of biological and temporal predictors in the dietary consumption of major prey groups.

Stepwise logistic regression to analyse the influence of four factors, including three biological traits (i.e., SEX, COL and SVL) and the temporal-predictor SEASON, in the probability of the binomial distribution consuming one prey group against the other two, i.e., amphibians *vs* reptiles + mammals, reptiles *vs* amphibians + mammals, mammals *vs* amphibians + reptiles, coding first group as 1 and the other as 0. For each model, the iteration process started with all predictors included, which were subsequently removed until reaching the most parsimonious solution (i.e. the model with the lowest value of Akaike Information Criterion; AIC). The significance of the regression coefficients of predictors is evaluated by Maximum Likelihood  $\chi^2$  tests. The effectiveness of the final model is assessed by the Hosmer-Lemeshow and McFadden's pseudo R-squared tests. Logistic regressions performed in R Studio version 1.1.463, using the available family of GLM stats in R.

Amphibians *vs* reptiles + mammals (n = 15 *vs* 167)

| Model                           | AIC   |  |  |  |  |
|---------------------------------|-------|--|--|--|--|
| PREY ~ SEX + COL + SVL + SEASON | 31.96 |  |  |  |  |
| PREY ~ COL + SVL + SEASON       | 29.96 |  |  |  |  |
| PREY ~ SVL + SEASON             | 28.02 |  |  |  |  |
| PREY ~ SVL                      | 26.09 |  |  |  |  |

  

|                     | D | Deviance | Resid. | Pr(>Chi |
|---------------------|---|----------|--------|---------|
| formula: PREY ~ SVL | F | Resid.   | DF     | Dev )   |

|     |   |        |    |        |              |
|-----|---|--------|----|--------|--------------|
|     |   |        | 14 | 72.919 |              |
|     |   |        | 5  |        |              |
| SVL | 1 | 16.933 | 14 | 55.986 | <b>0.000</b> |
|     |   |        | 4  |        |              |

---

Hosmer and Lemeshow, P =

0.232

McFadden's R2 = 243

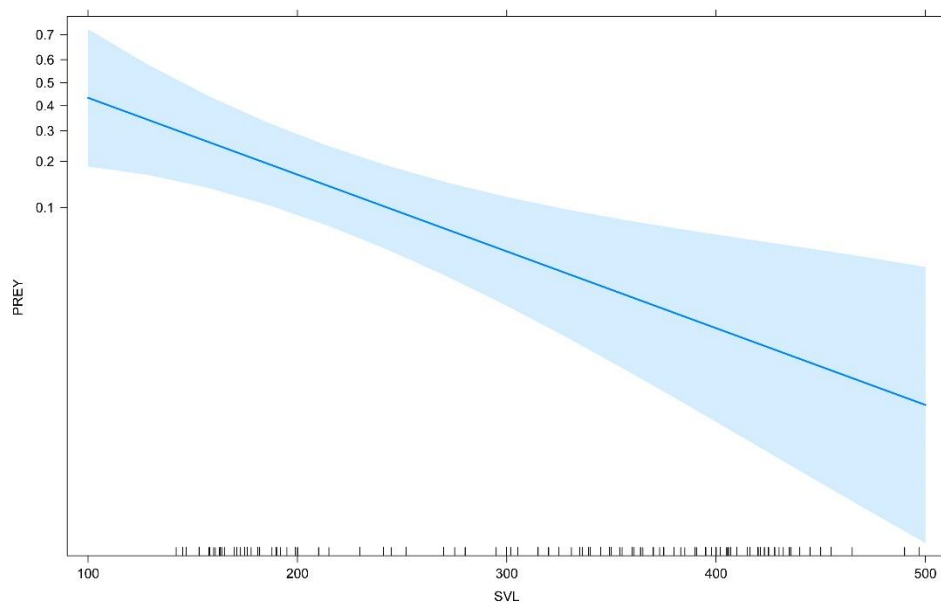

**Figure S2.** Response plot resulting from the logistic regression of the consumption of amphibians according to SVL (in mm).

Reptiles vs amphibians + mammals (n = 31 vs 151)

| Model                           | AIC   |
|---------------------------------|-------|
| PREY ~ SEX + COL + SVL + SEASON | 66.58 |
| PREY ~ SEX + COL + SVL          | 64.6  |
| PREY ~ COL + SVL                | 63.2  |



| Formula: PREY ~ COL + SVL |   |          |    |         |              |
|---------------------------|---|----------|----|---------|--------------|
|                           | D | Deviance | DF | Resid.  | Pr(>Chi      |
|                           | F | Resid.   |    | Dev     | )            |
|                           |   |          | 11 | 117.217 |              |
|                           |   |          | 9  |         |              |
| COL                       | 1 | 0.027    | 11 | 89.202  | 0.269        |
|                           |   |          | 7  |         |              |
| SVL                       | 1 | 28.042   | 11 | 89.229  | <b>0.000</b> |
|                           |   |          | 8  |         |              |

Hosmer and Lemeshow, P =

0.227

McFadden's R2 = -0.205

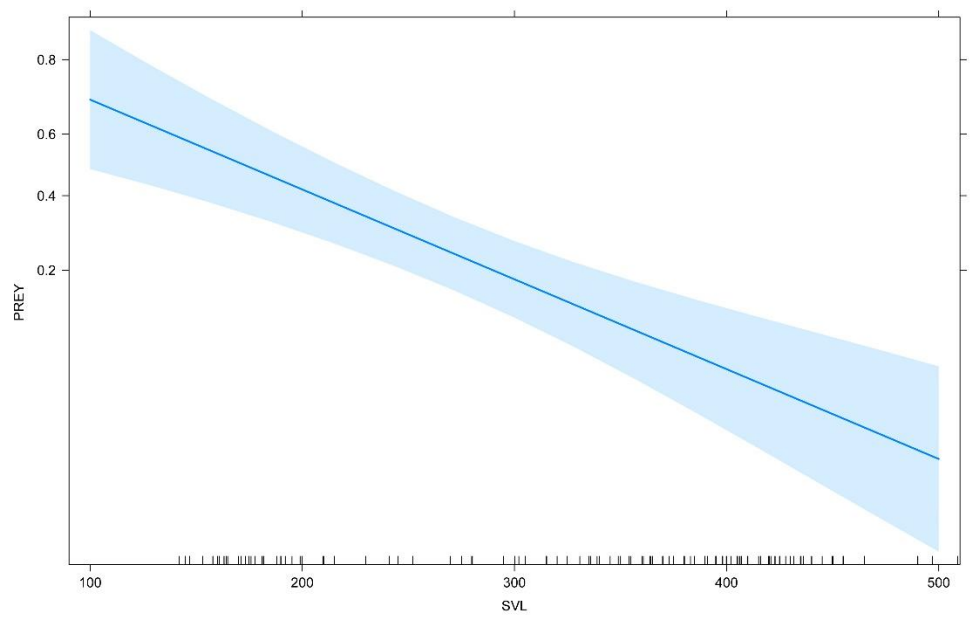

**Figure S3.** Response plot resulting from the logistic regression of the consumption of reptiles according to SVL (in mm).

Mammals vs amphibians + reptiles (n = 136 vs 46)

| Model                           | AIC   |
|---------------------------------|-------|
| PREY ~ SEX + COL + SVL + SEASON | 70.13 |
| PREY ~ SEX + COL + SVL          | 68.15 |
| PREY ~ COL + SVL                | 66.69 |
| PREY ~ SVL                      | 66.3  |

| Formula: PREY ~ SVL | D | Deviance | DF | Resid. | Pr(>Chi      |
|---------------------|---|----------|----|--------|--------------|
|                     | F | Resid.   |    | Dev    | )            |
|                     |   |          | 14 | 165.29 |              |
|                     |   |          | 5  |        |              |
| SVL                 | 1 | 56.163   | 14 | 109.13 | <b>0.000</b> |
|                     |   |          | 4  |        |              |

Hosmer and Lemeshow, P =

.34

McFadden's R2 = -0.474

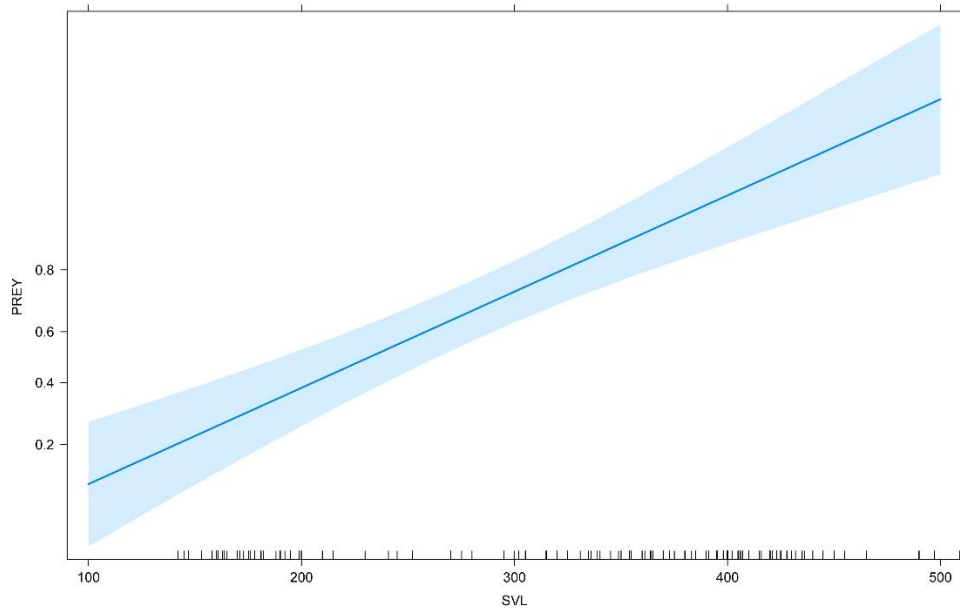

**Figure S4.** Response plot resulting from the logistic regression of the consumption of mammals according to SVL (in mm).

**Text S3.** Logistic regression analysis of eco-geographic predictors in the dietary consumption of major prey groups.

Stepwise logistic regression to analyse the influence of eight eco-geographic predictors, four habitat (FOREST, MOORS, PAST and AGRIC) and four climatic (MeanT, MaxT, APrec and DrPrec), in the probability of the binomial distribution consuming one prey group against the other two, i.e., amphibians vs reptiles + mammals, reptiles vs amphibians + mammals, mammals vs amphibians + reptiles, coding first group as 1 and the other as 0. For each pair of groups, model iteration process started with all predictors included, which were subsequently removed until reaching the most parsimonious solution (i.e. the model with the lowest value of Akaike Information Criterion; AIC). The significance of the regression coefficients of predictors is evaluated by Maximum Likelihood  $\chi^2$  tests. The effectiveness of the final model is assessed by the Hosmer-Lemeshow and McFadden's pseudo R-squared tests. Response plots depicting the relation between prey consumption and statistically significant eco-geographic factors are available in Figure 3. Logistic regressions performed in R Studio version 1.1.463, using the available family of GLM stats in R.

Amphibians vs reptiles + mammals (n = 15 vs 167)

| Model                                                                   | AIC   |
|-------------------------------------------------------------------------|-------|
| PREY ~ FOREST + MOORS + PAST + AGRIC + MeanT + MaxT + APrec<br>+ DrPrec | 96.86 |

|                                                              |       |
|--------------------------------------------------------------|-------|
| PREY ~ FOREST + PAST + AGRIC + MeanT + MaxT + APrec + DrPrec | 94.86 |
| PREY ~ FOREST + PAST + AGRIC + MeanT + APrec + DrPrec        | 93.29 |
| PREY ~ FOREST + PAST + AGRIC + MeanT + APrec                 | 91.73 |
| PREY ~ FOREST + PAST + AGRIC + APrec                         | 91.35 |

| Formula: PREY ~ FOREST + PAST + AGRIC + APrec | DF | Deviance Resid. | DF  | Resid. Dev | Pr(>Chi)     |
|-----------------------------------------------|----|-----------------|-----|------------|--------------|
|                                               |    |                 | 176 | 102.734    |              |
| FOREST                                        | 1  | 4.368           | 175 | 98.367     | <b>0.037</b> |
| PAST                                          | 1  | 1.708           | 174 | 96.659     | 0.191        |
| AGRIC                                         | 1  | 2.527           | 173 | 94.132     | 0.112        |
| APrec                                         | 1  | 12.786          | 172 | 81.346     | <b>0.000</b> |

Hosmer and Lemeshow, P = 0.208

McFadden's R2 = 0.215

Reptiles vs amphibians + mammals (n = 31 vs 151)

| Model                                                                   | AIC    |
|-------------------------------------------------------------------------|--------|
| PREY ~ FOREST + MOORS + PAST + AGRIC + MeanT + MaxT + APrec<br>+ DrPrec | 160.03 |
| PREY ~ FOREST + MOORS + AGRIC + MeanT + MaxT + APrec +<br>DrPrec        | 158.45 |
| PREY ~ FOREST + MOORS + AGRIC + MeanT + MaxT + APrec +<br>DrPrec        | 157.45 |
| PREY ~ FOREST + AGRIC + MeanT + MaxT + APrec                            | 156.27 |
| PREY ~ AGRIC + MeanT + MaxT + APrec                                     | 155.27 |
| PREY ~ AGRIC + MaxT + APrec                                             | 154.51 |

| Formula: PREY ~ AGRIC + MaxT + Aprec | DF | Deviance Resid. | DF  | Resid. Dev | Pr(>Chi)     |
|--------------------------------------|----|-----------------|-----|------------|--------------|
|                                      |    |                 | 176 | 161.1      |              |
| AGRIC                                | 1  | 4.598           | 175 | 156.5      | <b>0.032</b> |
| MaxT                                 | 1  | 7.265           | 174 | 149.24     | <b>0.007</b> |

|       |   |       |     |        |       |
|-------|---|-------|-----|--------|-------|
| APrec | 1 | 2.725 | 173 | 146.51 | 0.099 |
|-------|---|-------|-----|--------|-------|

---

Hosmer and Lemeshow, P = 0.091

McFadden's R2 = 0.118

Mammals vs amphibians + reptiles (n = 136 vs 46)

| Model | AIC |
|-------|-----|
|-------|-----|

|                                                                      |        |
|----------------------------------------------------------------------|--------|
| PREY ~ FOREST + MOORS + PAST + AGRIC + MeanT + MaxT + APrec + DrPrec | 191.87 |
|----------------------------------------------------------------------|--------|

|                                                              |        |
|--------------------------------------------------------------|--------|
| PREY ~ FOREST + MOORS + PAST + AGRIC + MeanT + MaxT + DrPrec | 190.94 |
|--------------------------------------------------------------|--------|

|                                                      |        |
|------------------------------------------------------|--------|
| PREY ~ FOREST + PAST + AGRIC + MeanT + MaxT + DrPrec | 189.65 |
|------------------------------------------------------|--------|

|                                             |        |
|---------------------------------------------|--------|
| PREY ~ FOREST + PAST + AGRIC + MeanT + MaxT | 188.82 |
|---------------------------------------------|--------|

|                                     |        |
|-------------------------------------|--------|
| PREY ~ FOREST + PAST + AGRIC + MaxT | 188.53 |
|-------------------------------------|--------|

---

| Formula: PREY ~ FOREST + PAST + AGRIC + MaxT | DF | Deviance Resid. | DF | Resid. Dev | Pr(>Chi) |
|----------------------------------------------|----|-----------------|----|------------|----------|
|----------------------------------------------|----|-----------------|----|------------|----------|

|     |       |
|-----|-------|
| 176 | 200.7 |
|-----|-------|

|        |   |       |     |        |              |
|--------|---|-------|-----|--------|--------------|
| FOREST | 1 | 2.795 | 175 | 197.9  | 0.095        |
| PAST   | 1 | 1.155 | 174 | 196.75 | 0.282        |
| AGRIC  | 1 | 9.280 | 173 | 187.47 | <b>0.002</b> |
| MaxT   | 1 | 8.935 | 172 | 178.53 | <b>0.003</b> |

---

Hosmer and Lemeshow, P = 0.11

McFadden's R2 = 0.132
